# Supplementary material
Source: ML conference proceedings conference paper supplement (https://proceedings.neurips.cc/paper_files/paper/2020/hash/1e0b802d5c0e1e8434a771ba7ff2c301-Abstract.html)

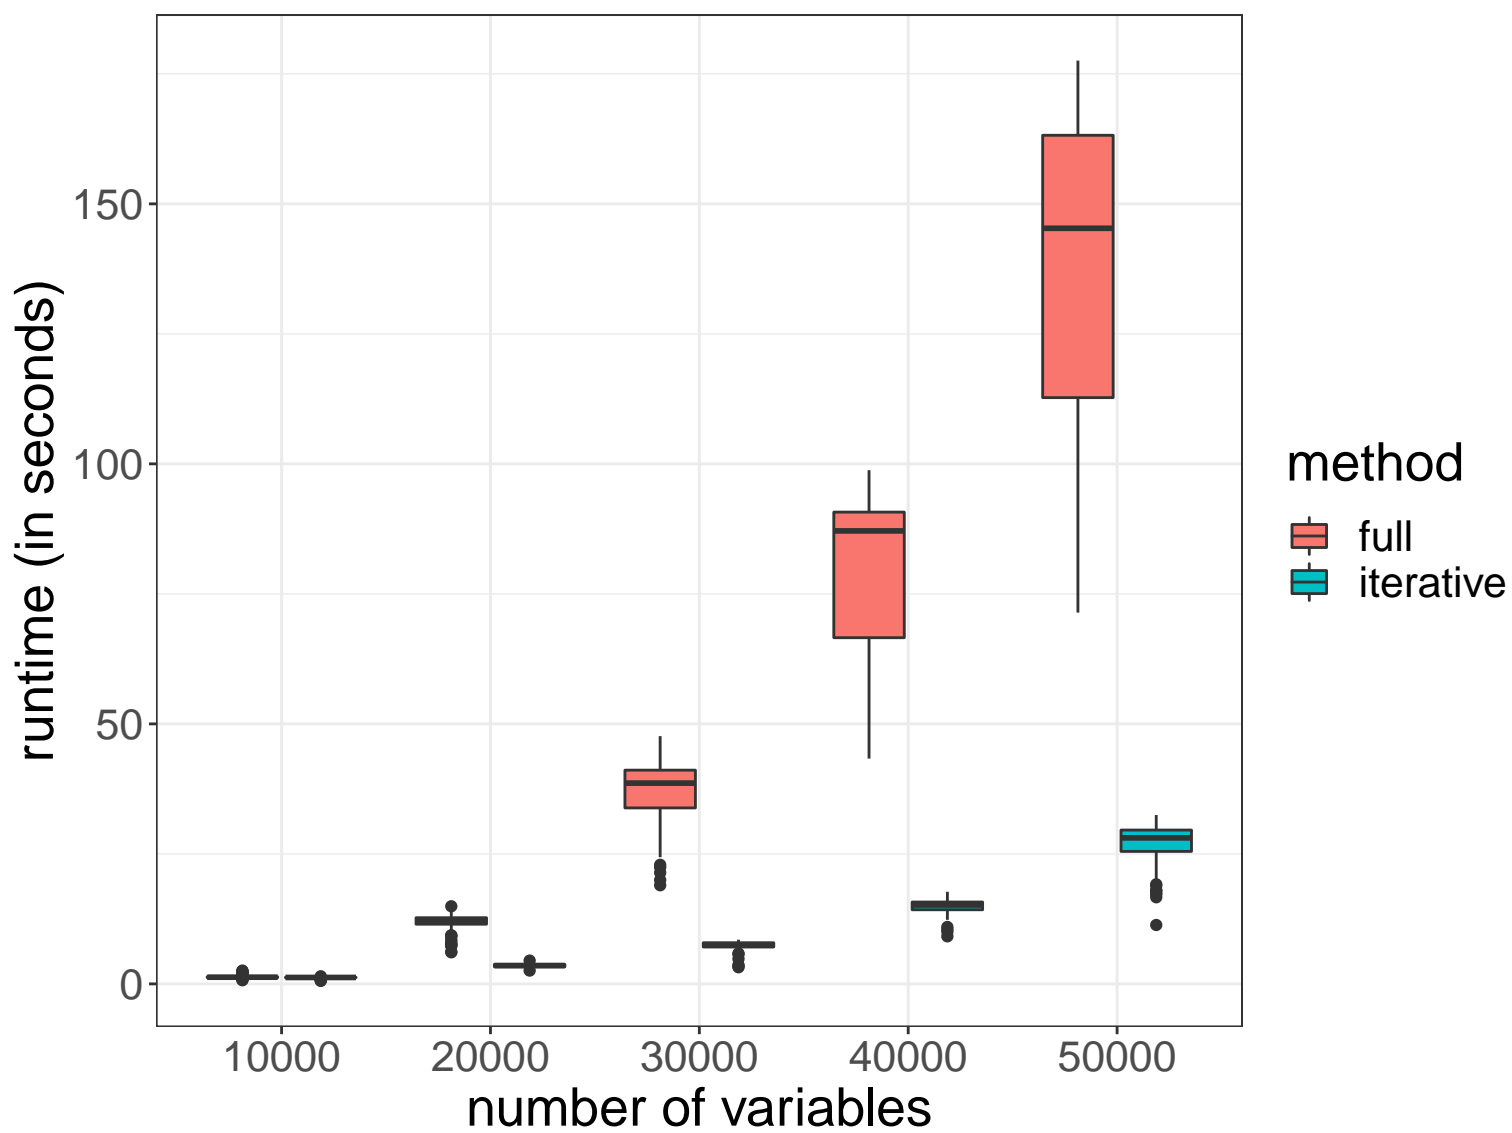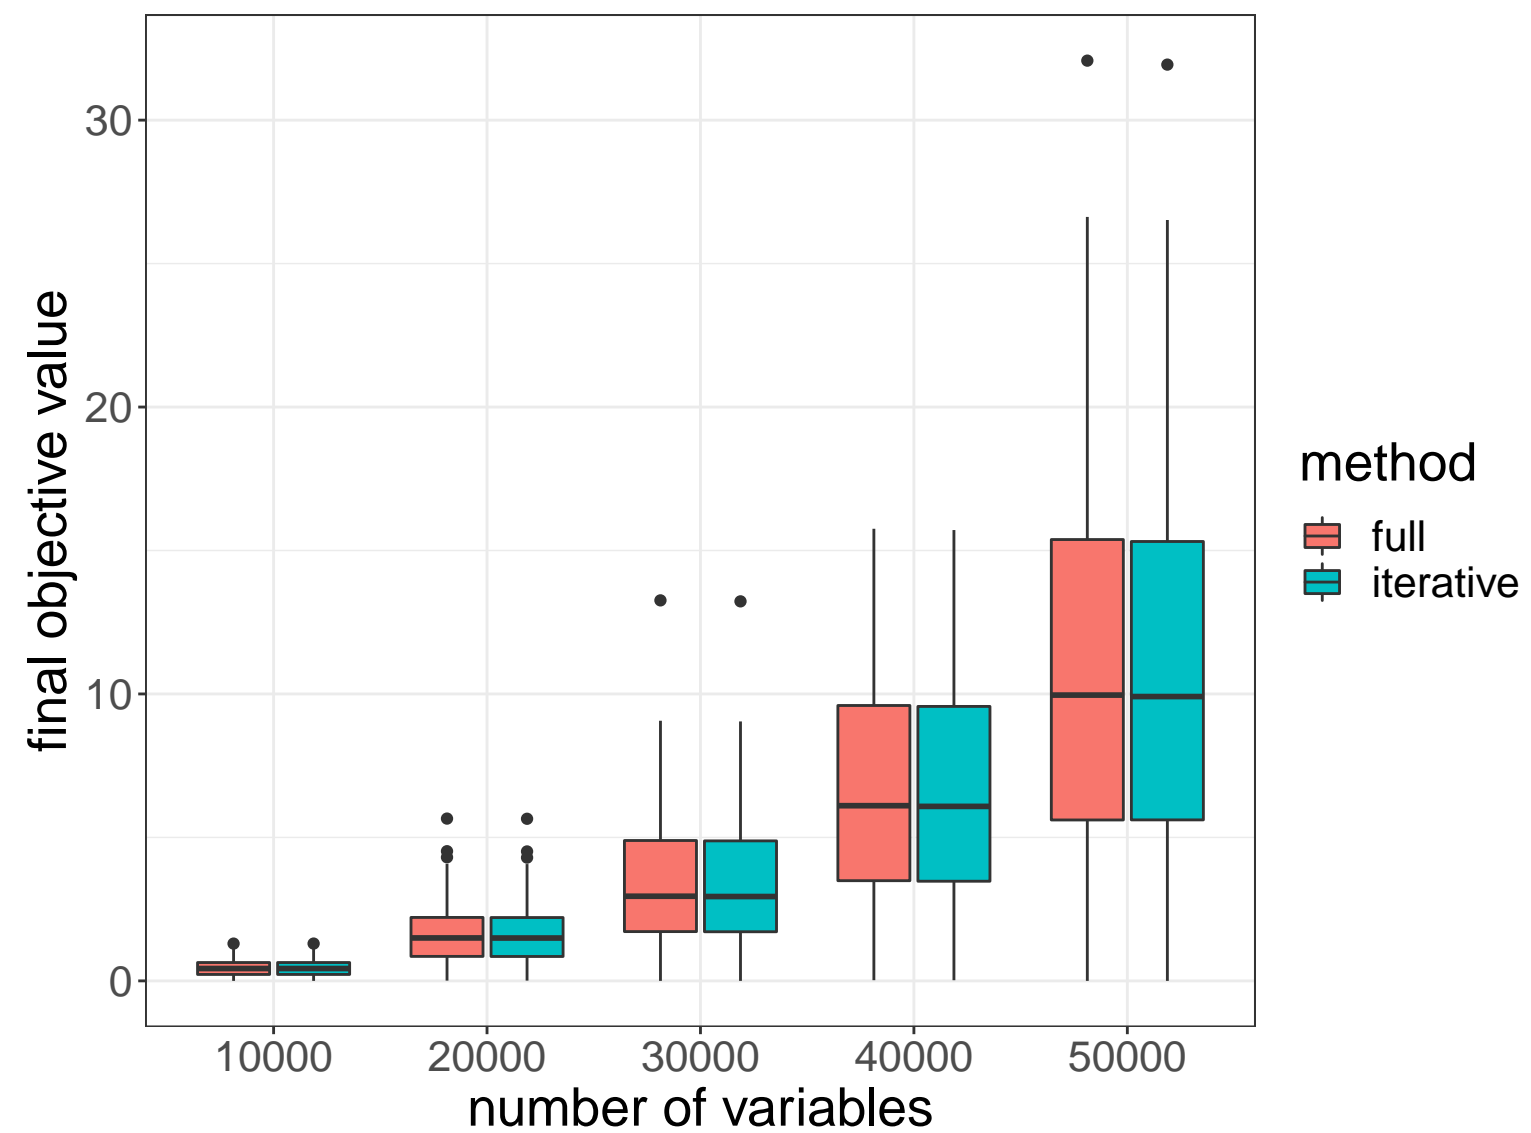

Supplement: Supplementary file [file 1e0b802d5c0e1e8434a771ba7ff2c301-Supplemental.zip]
